# Supplementary material for: Design, synthesis and evaluation of quinolinone derivatives containing dithiocarbamate moiety as multifunctional AChE inhibitors for the treatment of Alzheimer’s disease
Source: PubMed Central journal article supplement (PMC6844382; doi:10.1080/14756366.2019.1687460), 2019-11-07
Supplement: IENZ_A_1687460_SM8197.pdf [file IENZ_A_1687460_SM8197.pdf]

## Supporting Information

### **Design, synthesis and evaluation of quinolinone derivatives containing dithiocarbamate moiety as multifunctional AChE inhibitors for the treatment of Alzheimer's disease**

Jie Fu<sup>a,b</sup>, Fengqi Bao<sup>b</sup>, Min Gu<sup>b</sup>, Jing Liu<sup>d</sup>, Zhipeng Zhang<sup>c</sup>, Jiaoli Ding<sup>c</sup>, Sai-Sai Xie<sup>c\*</sup>,  
Jinsong Ding<sup>a\*</sup>

<sup>a</sup>Xiangya School of Pharmaceutical Sciences, Central South University, Changsha, Hunan, China.

<sup>b</sup>Jiangsu sinomune Pharmaceutical Co., Ltd., 35 Jingxin Road, Xibei Town Industrial Park, Xishan District, Wuxi, Jiangsu, China.

<sup>c</sup>National Pharmaceutical Engineering Center for Solid Preparation in Chinese Herbal Medicine, Jiangxi University of Traditional Chinese Medicine, Nanchang, China

<sup>d</sup>School of Pharmacy, Jiangxi University of Traditional Chinese Medicine, Nanchang, PR China

\*Authors for correspondence: [xiesaisainanchang@hotmail.com](mailto:xiesaisainanchang@hotmail.com) (Sai-Sai Xie)

\*Authors for correspondence: [dingjs0221@163.com](mailto:dingjs0221@163.com) (Jinsong Ding)

## Contents

- 1. The <sup>1</sup>H NMR, <sup>13</sup>C NMR and HRMS of the target compounds 4a-m and 9a-b. S2**
- 2. Docking results of compounds 4a-m and 9a-b with hAChE and TcAChE. S32**

<sup>1</sup>H NMR spectrum of compound **4a**

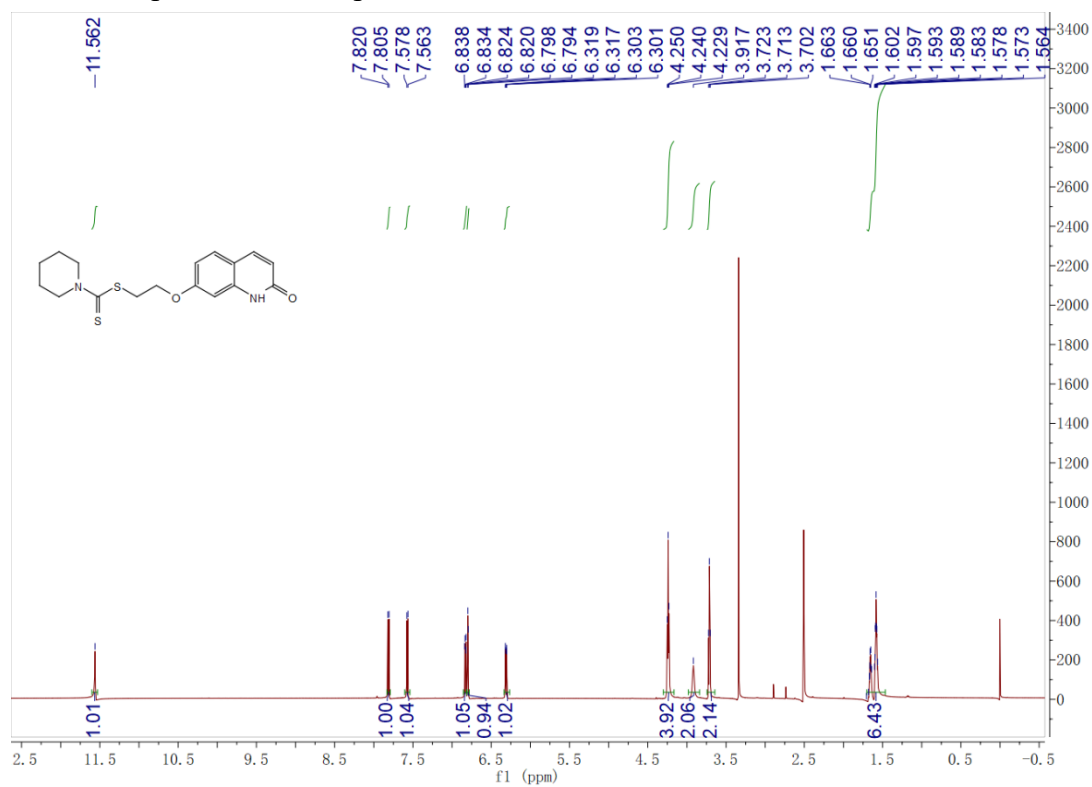

<sup>13</sup>C NMR spectrum of compound **4a**

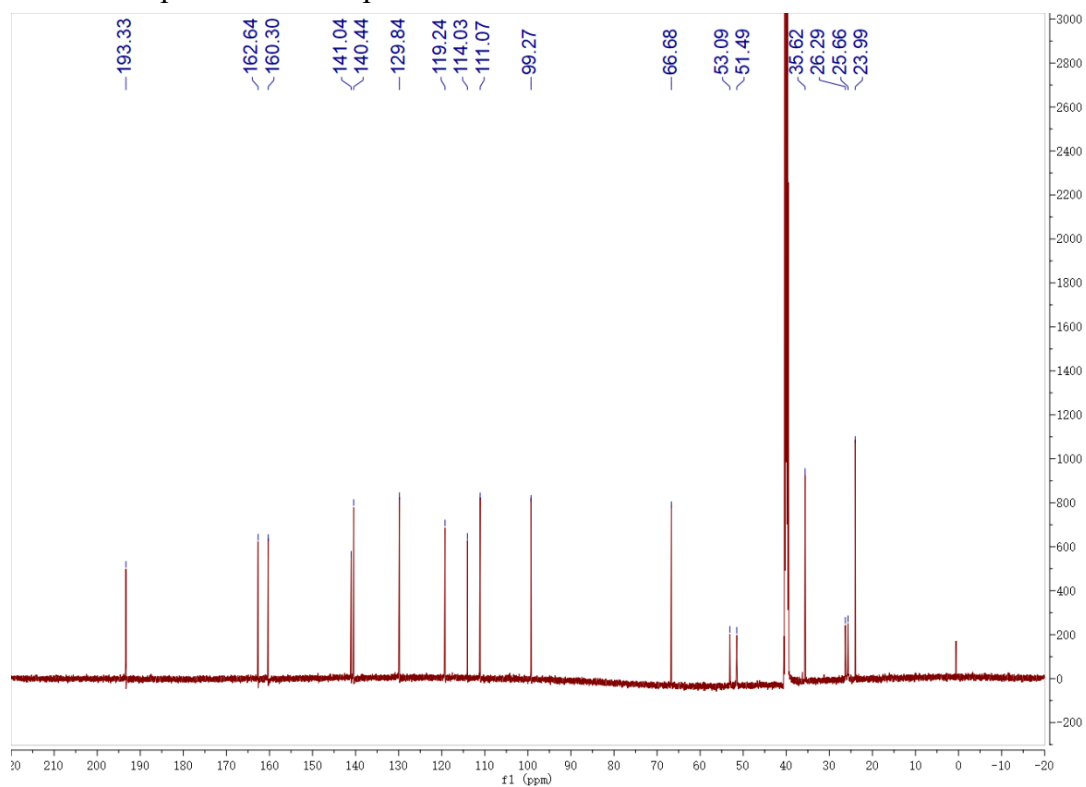

# HRMS (ESI) spectrum of compound **4a**.

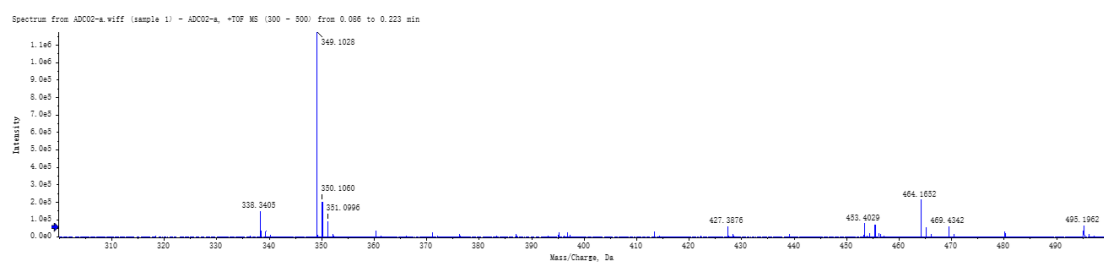

<sup>1</sup>H NMR spectrum of compound **4b**

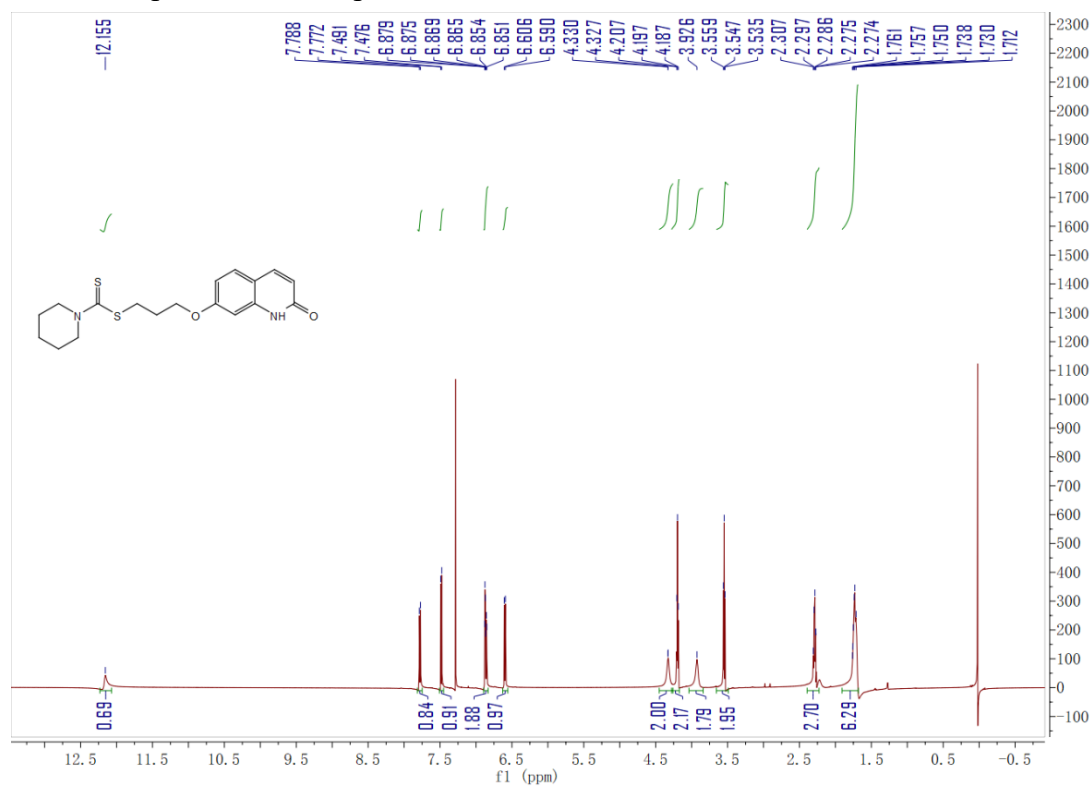

<sup>13</sup>C NMR spectrum of compound **4b**

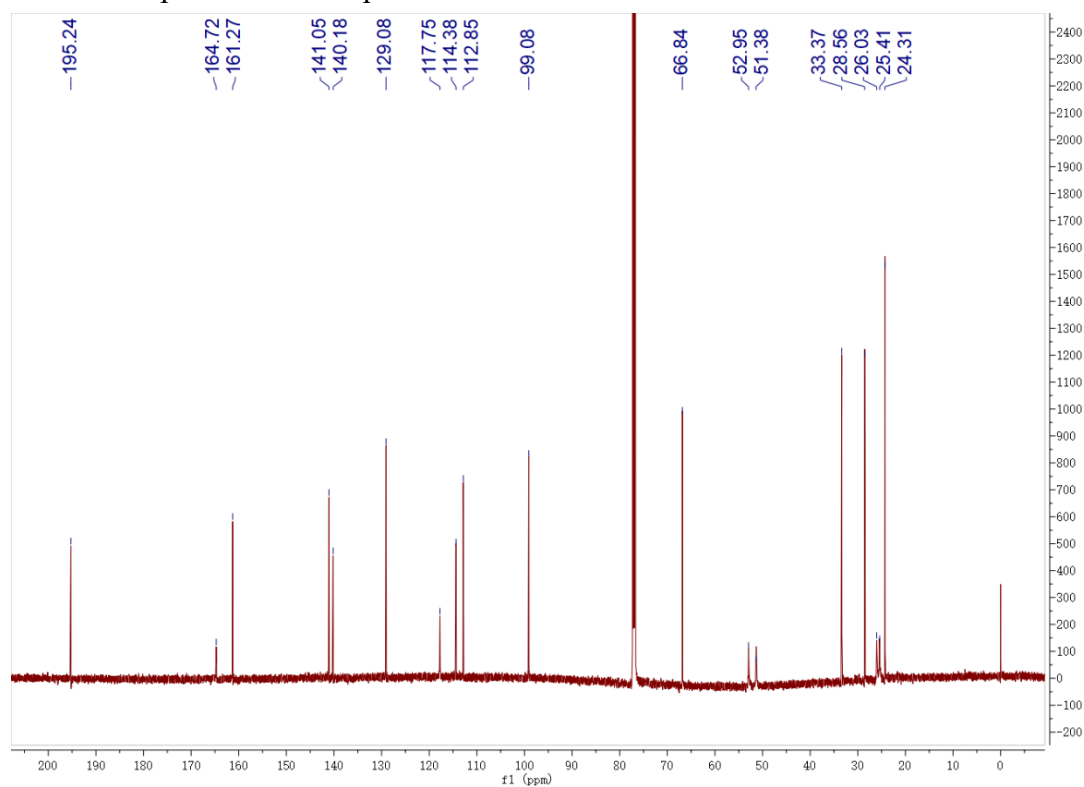

# HRMS (ESI) spectrum of compound **4b**.

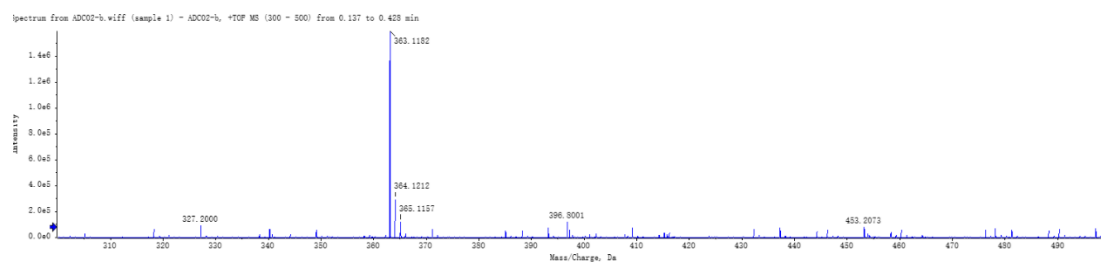

<sup>1</sup>H NMR spectrum of compound **4c**

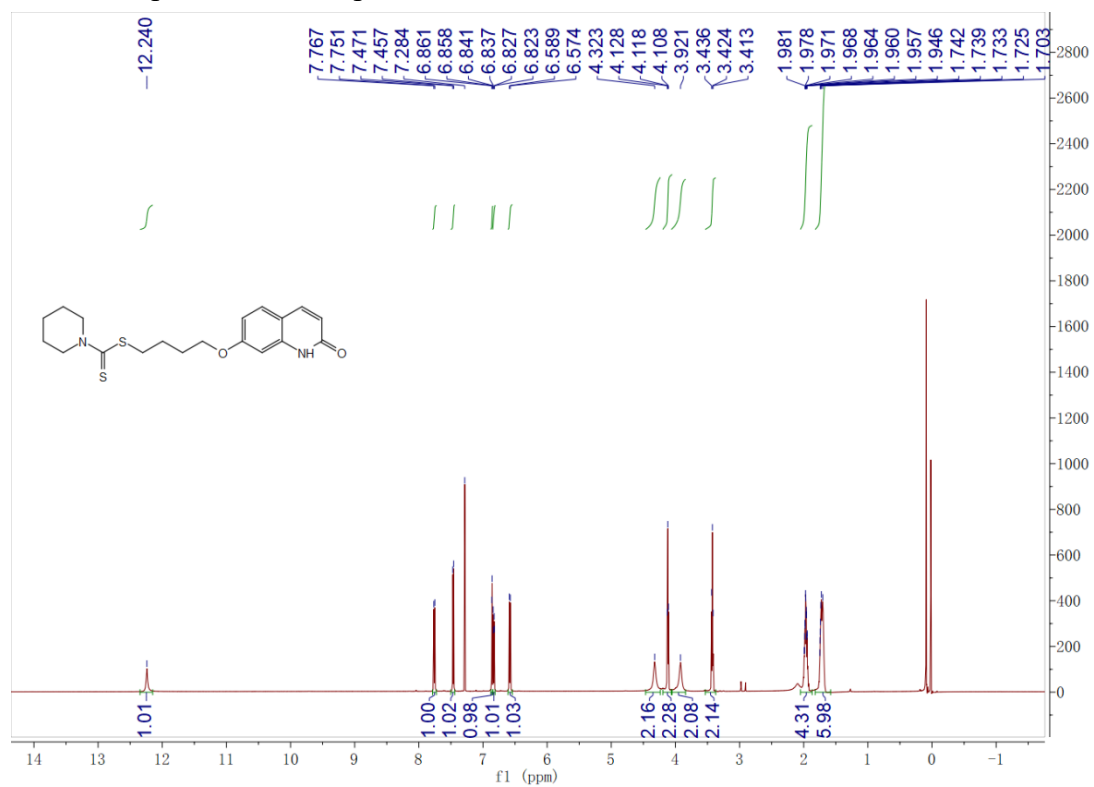

<sup>13</sup>C NMR spectrum of compound **4c**

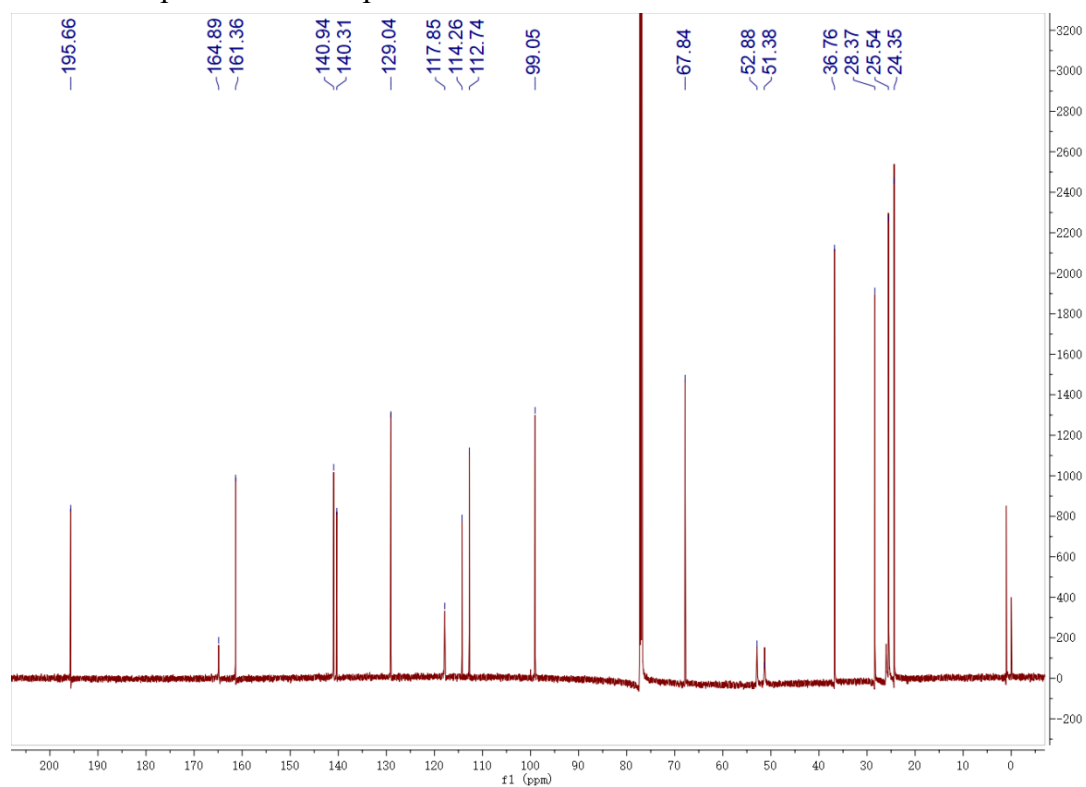

# HRMS (ESI) spectrum of compound **4c**.

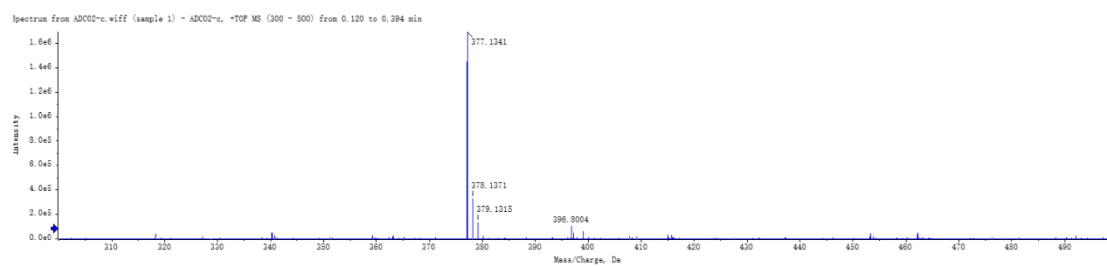

<sup>1</sup>H NMR spectrum of compound 4d

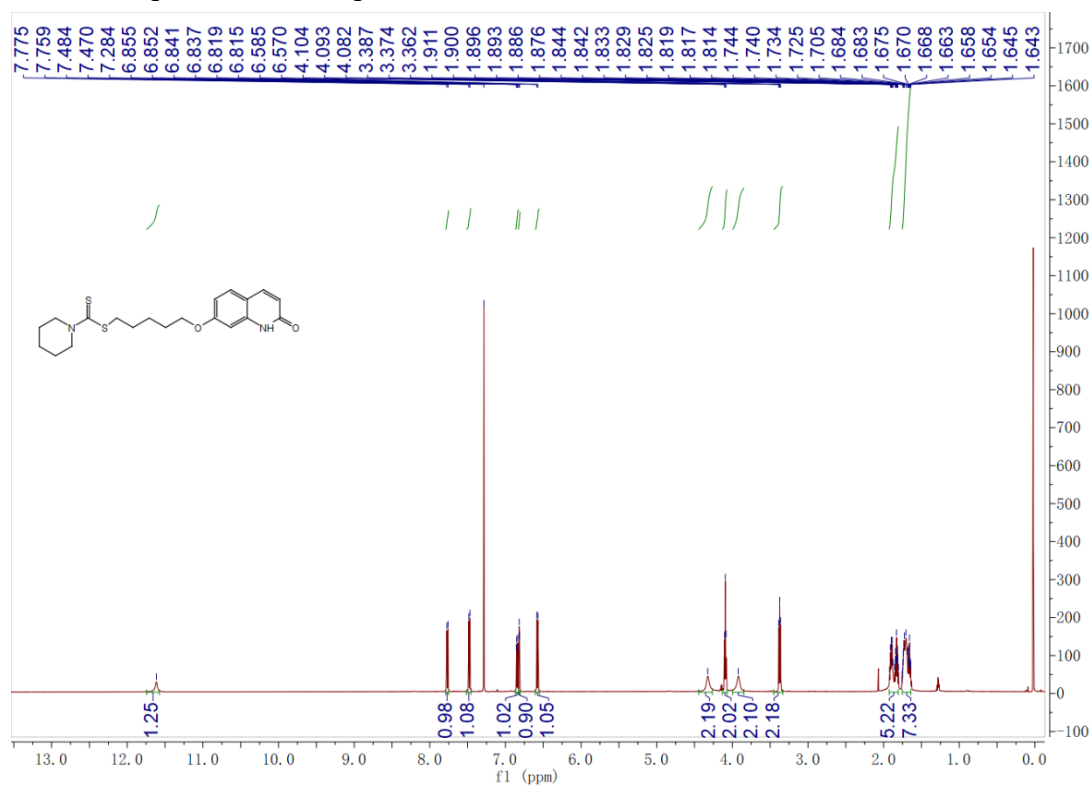

<sup>13</sup>C NMR spectrum of compound 4d

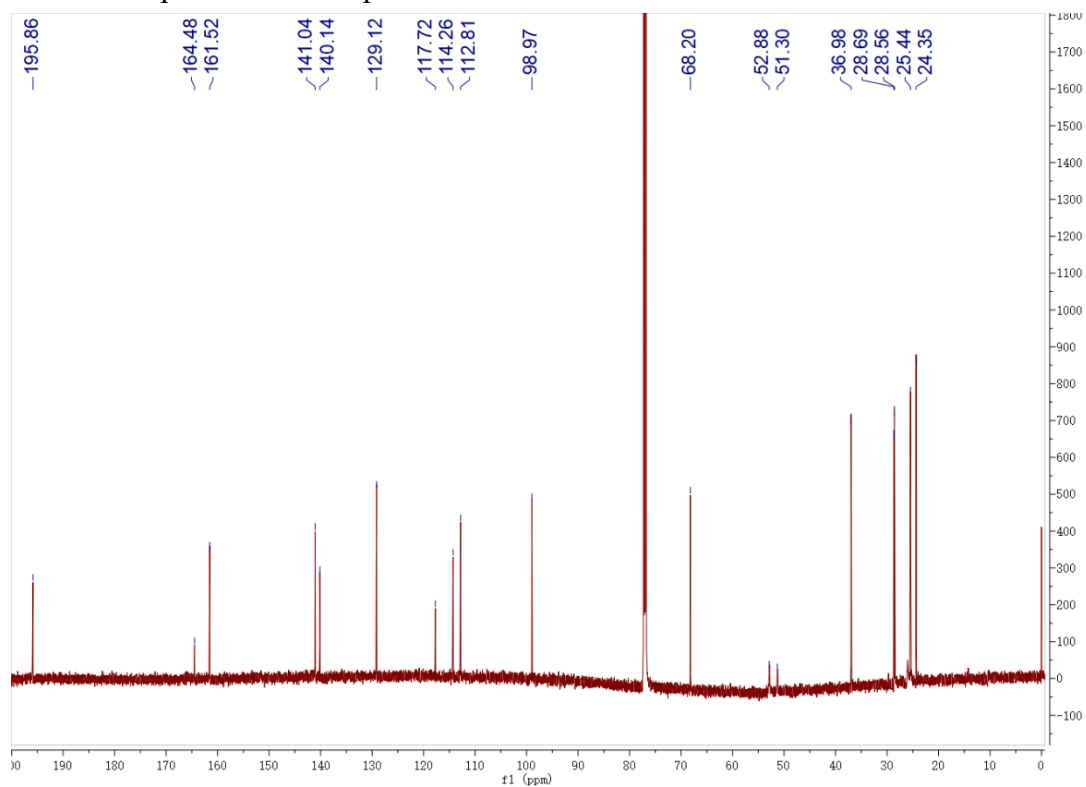



# HRMS (ESI) spectrum of compound **4d**.

Spectrum from AUKU2-d.w111 (sample 1) - AUKU2-d. \*10V MS (500 - 600) from 0.102 to 0.109 min

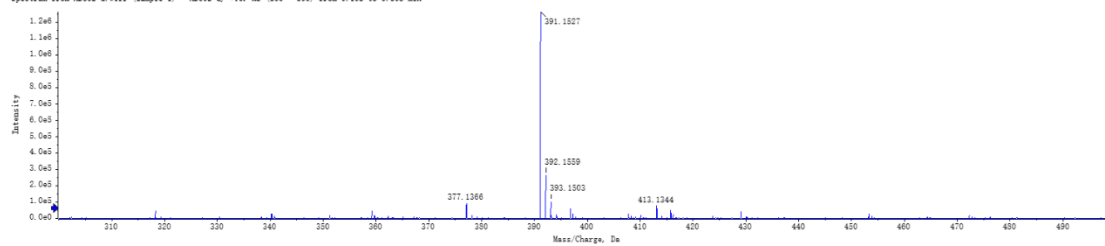

<sup>1</sup>H NMR spectrum of compound **4e**

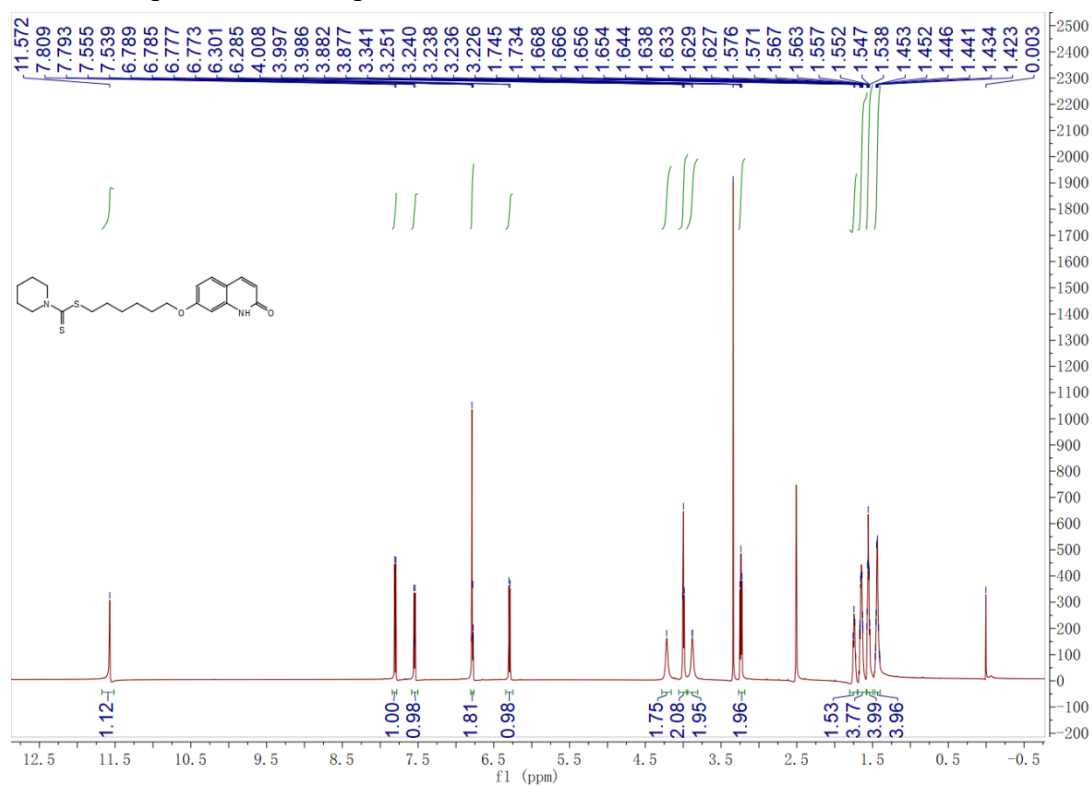

<sup>13</sup>C NMR spectrum of compound **4e**

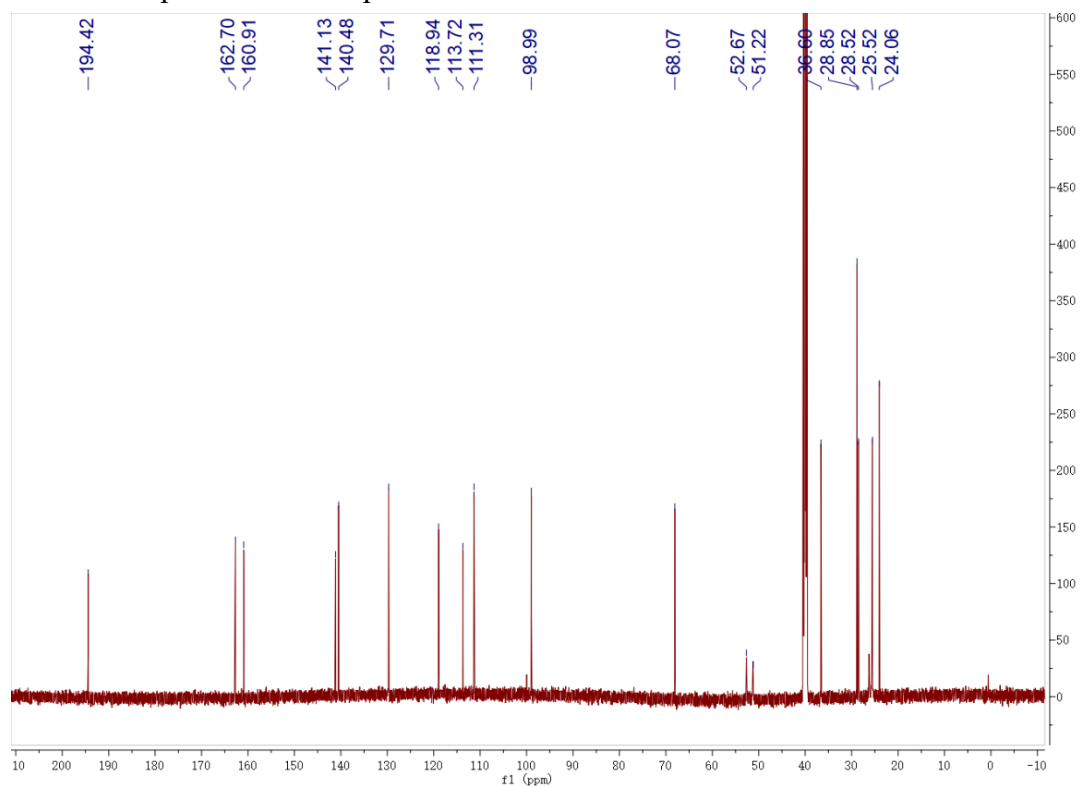

# HRMS (ESI) spectrum of compound **4e**.

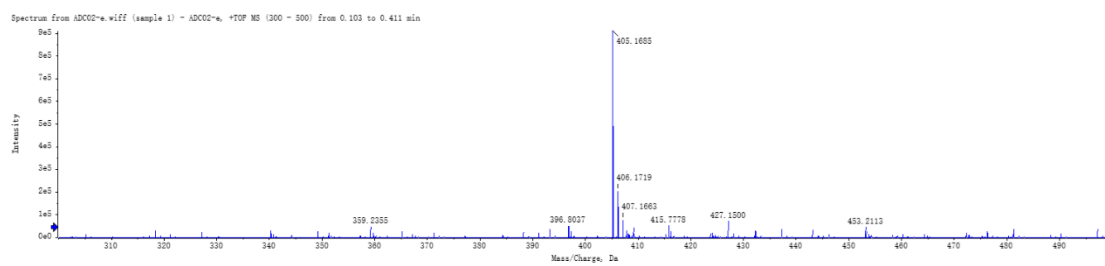

<sup>1</sup>H NMR spectrum of compound **4f**

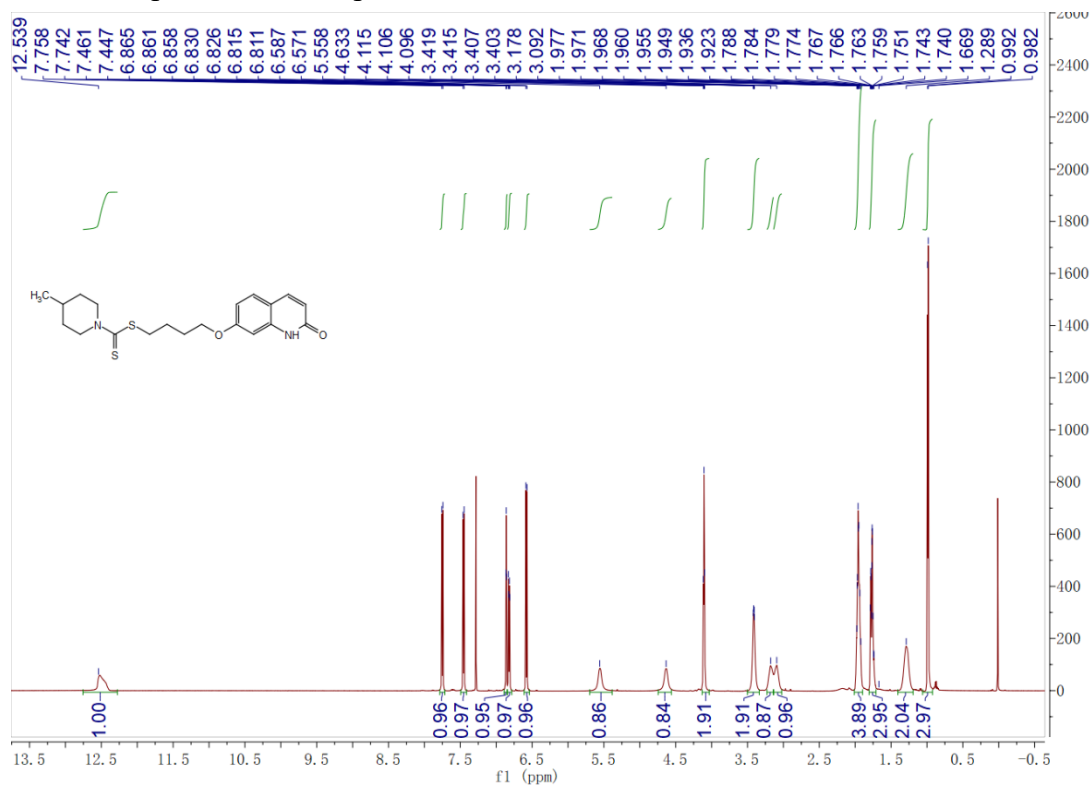

<sup>13</sup>C NMR spectrum of compound **4f**

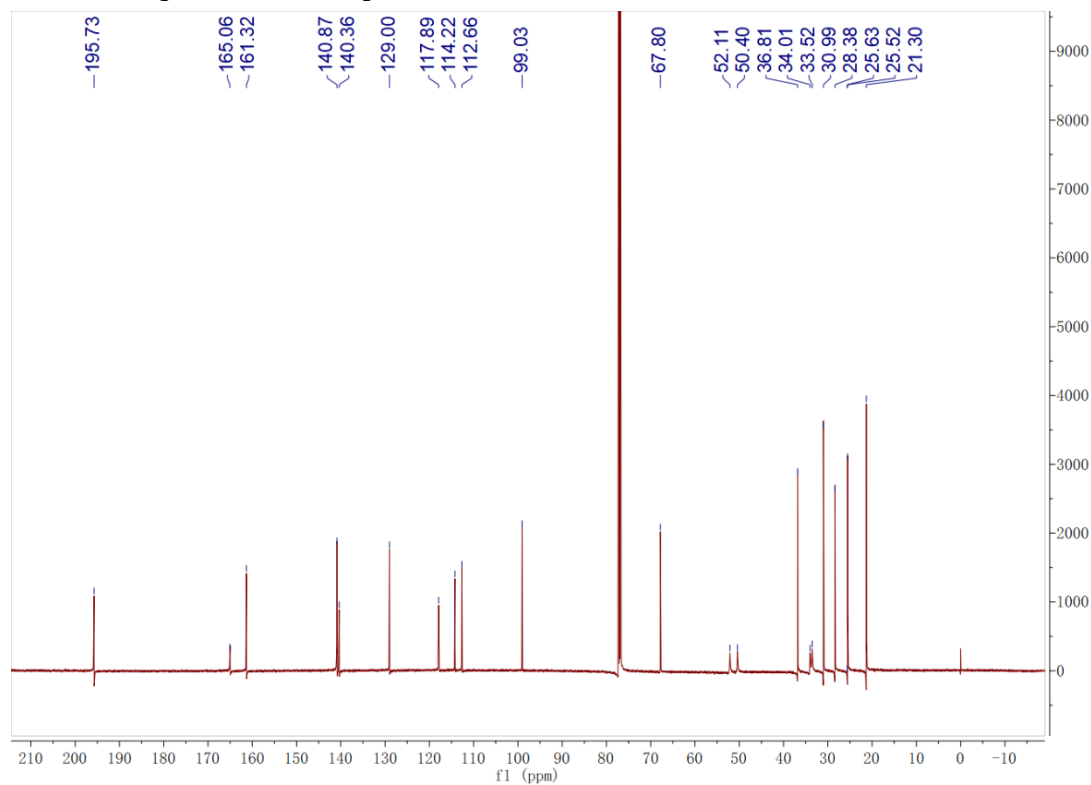

# HRMS (ESI) spectrum of compound **4f**.

Spectrum from ADC02-h.wiff (sample 1) - ADC02-h, +TOP MS (300 - 500) from 0.137 to 0.497 min

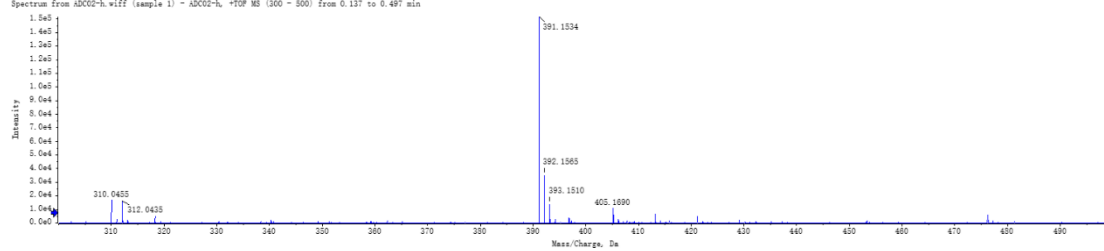

<sup>1</sup>H NMR spectrum of compound **4g**

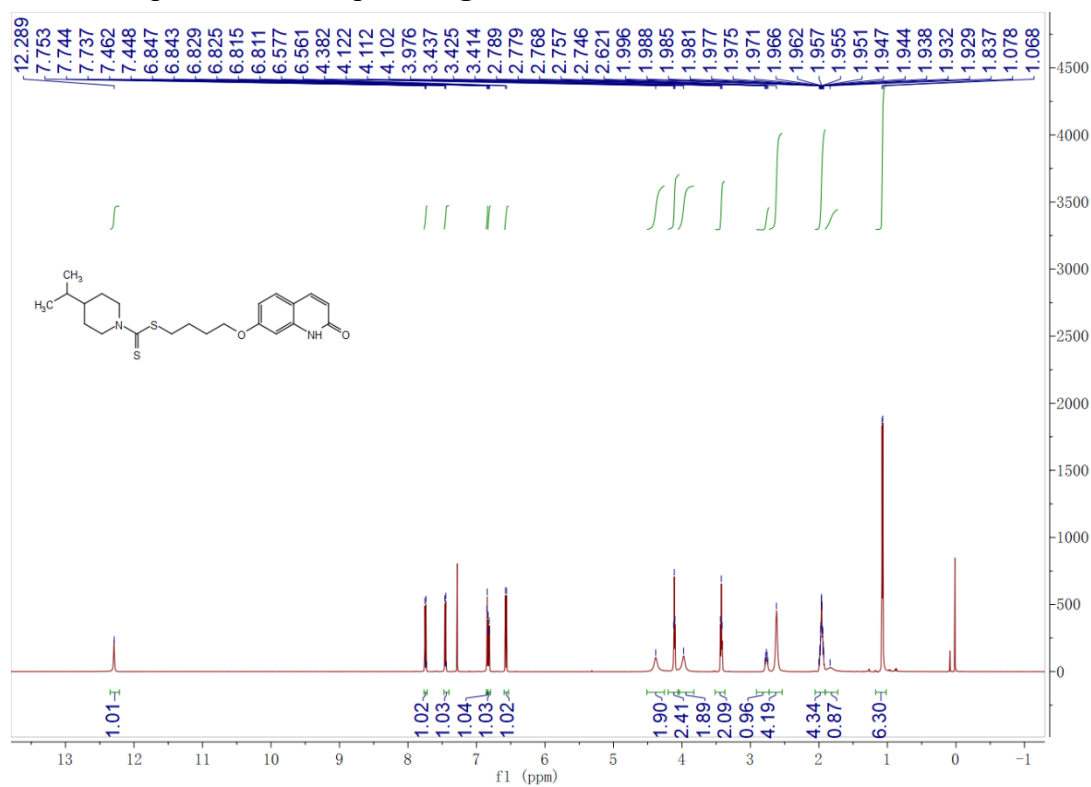

<sup>13</sup>C NMR spectrum of compound **4g**

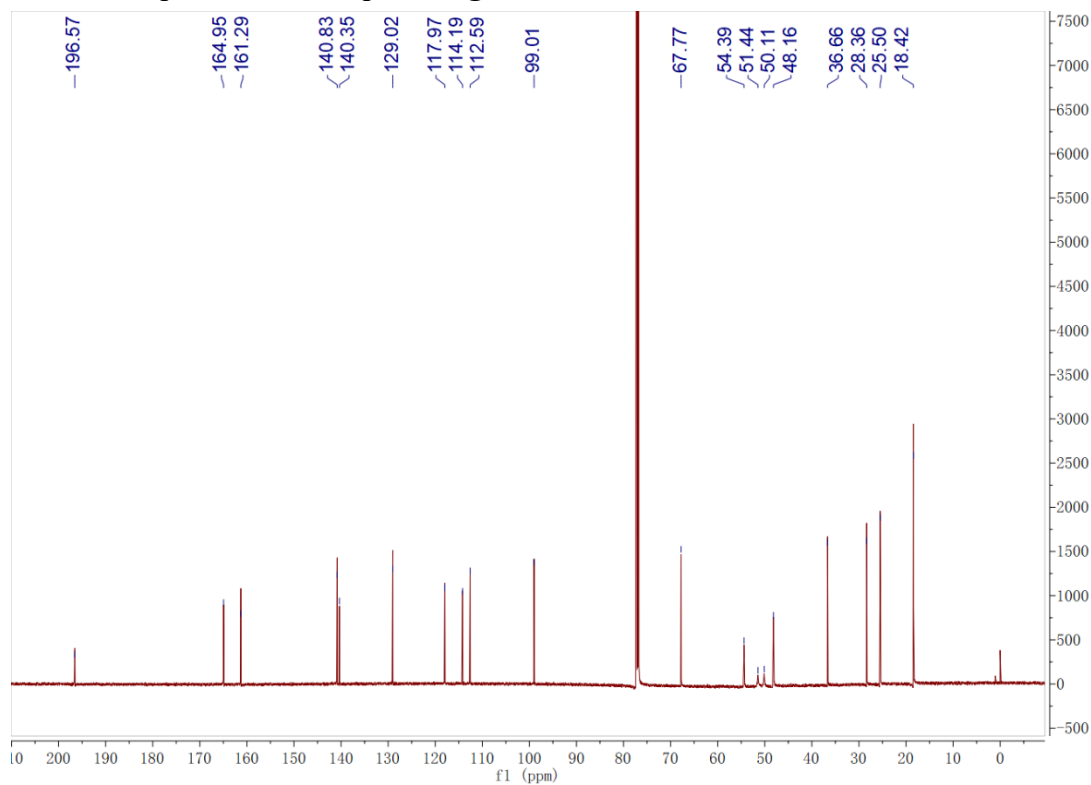

# HRMS (ESI) spectrum of compound **4g**.

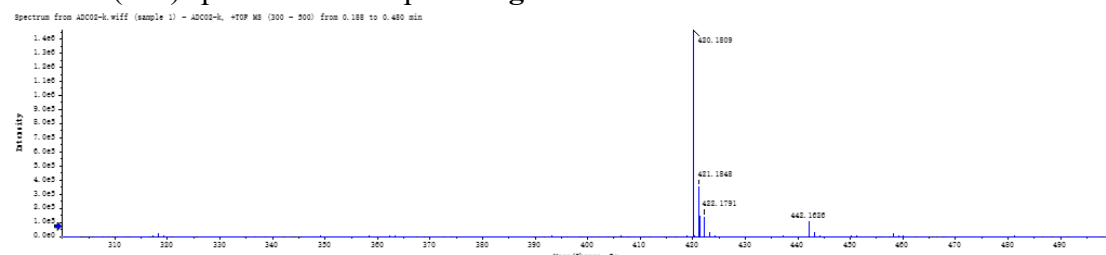

<sup>1</sup>H NMR spectrum of compound **4h**

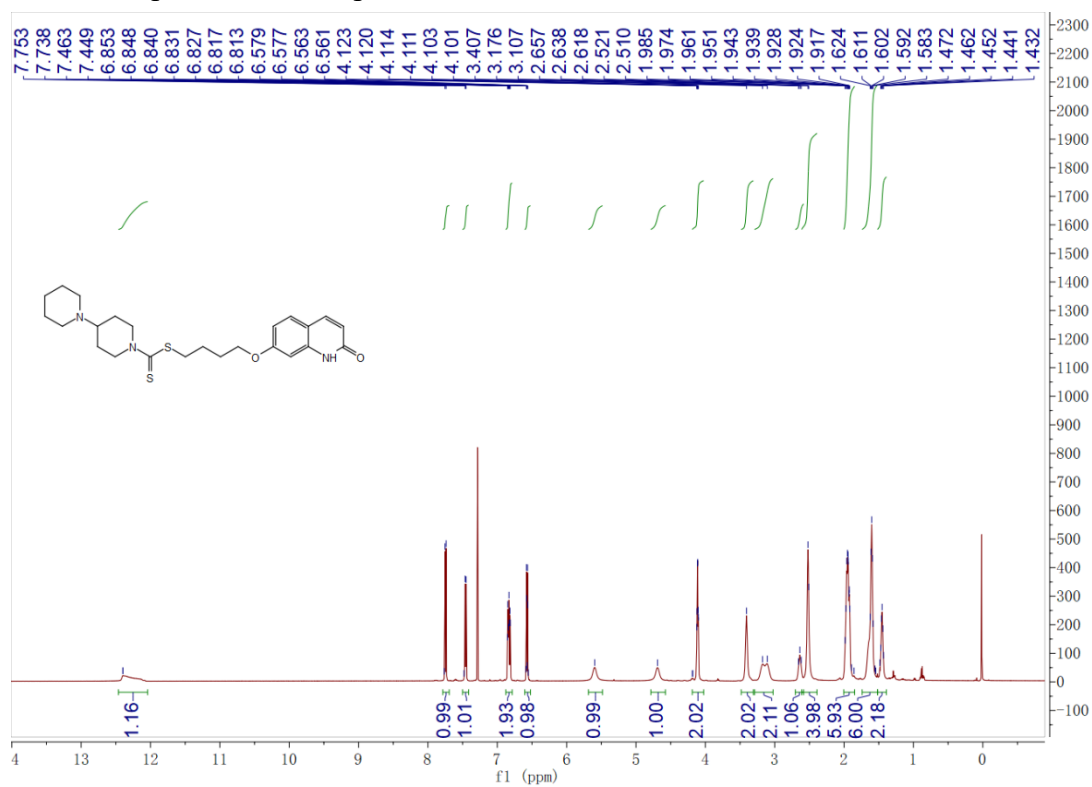

<sup>13</sup>C NMR spectrum of compound **4h**

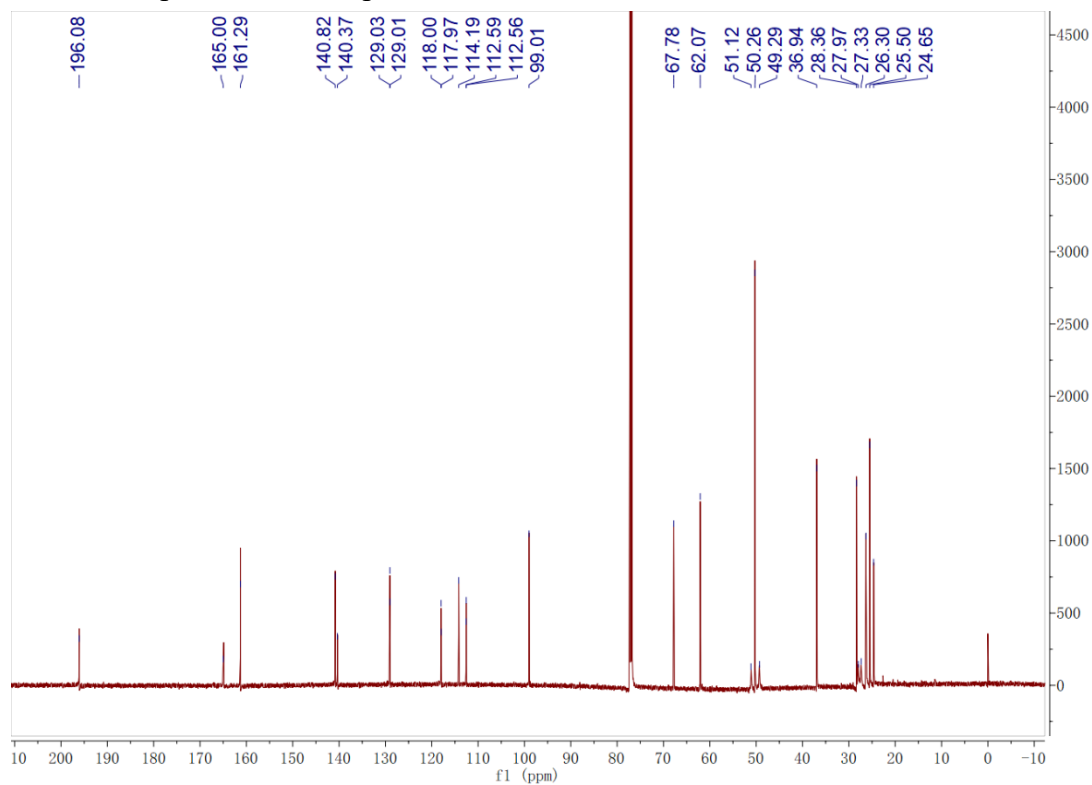



# HRMS (ESI) spectrum of compound **4h**.

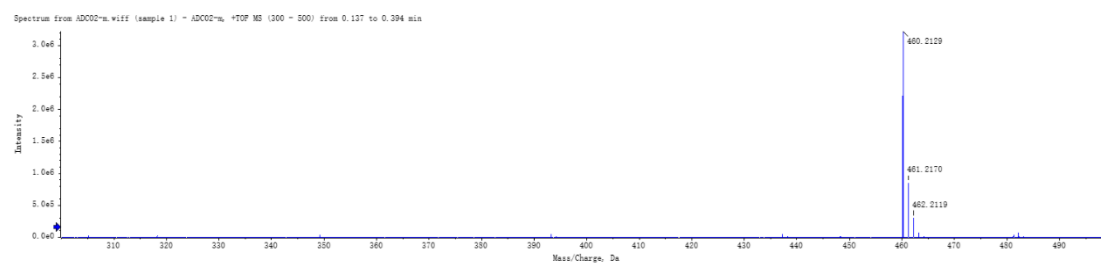

<sup>1</sup>H NMR spectrum of compound **4i**

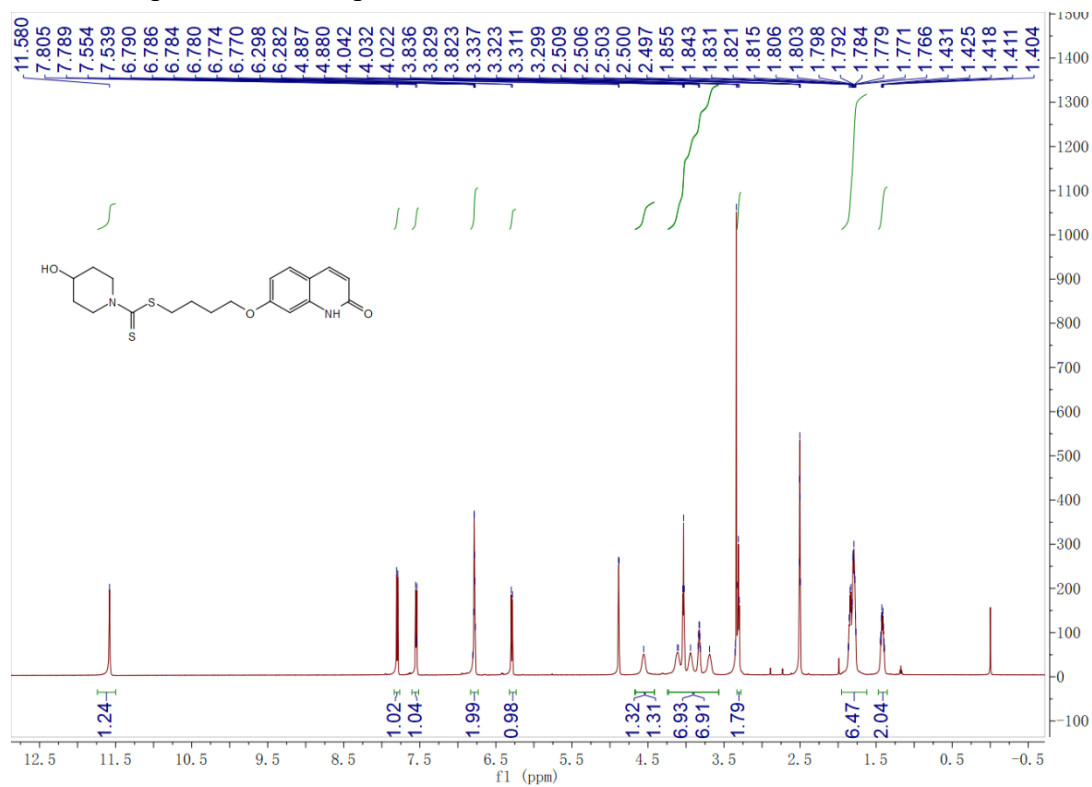

<sup>13</sup>C NMR spectrum of compound **4i**

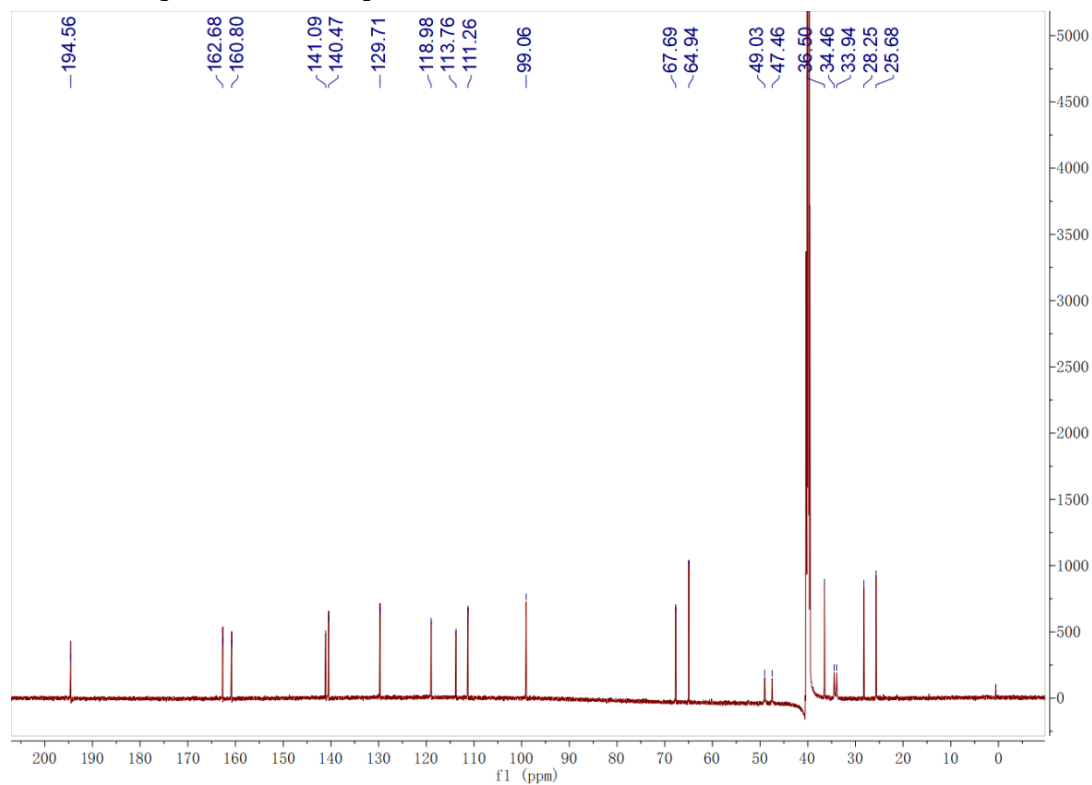

# HRMS (ESI) spectrum of compound **4i**.

Spectrum from ADC02-L.wiff (sample 1) - ADC02-L, +70F MS (300 - 500) from 0.205 to 0.545 min.

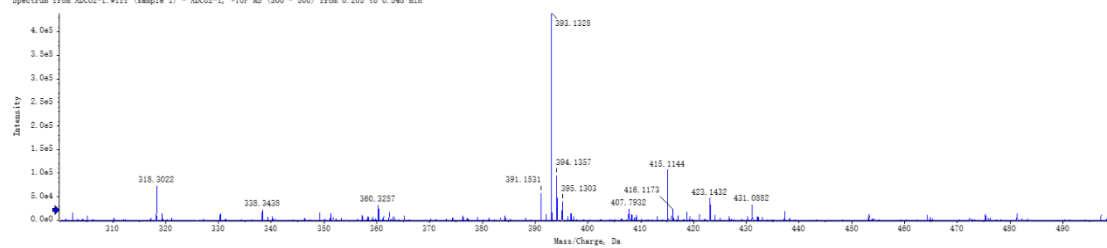

<sup>1</sup>H NMR spectrum of compound 4j

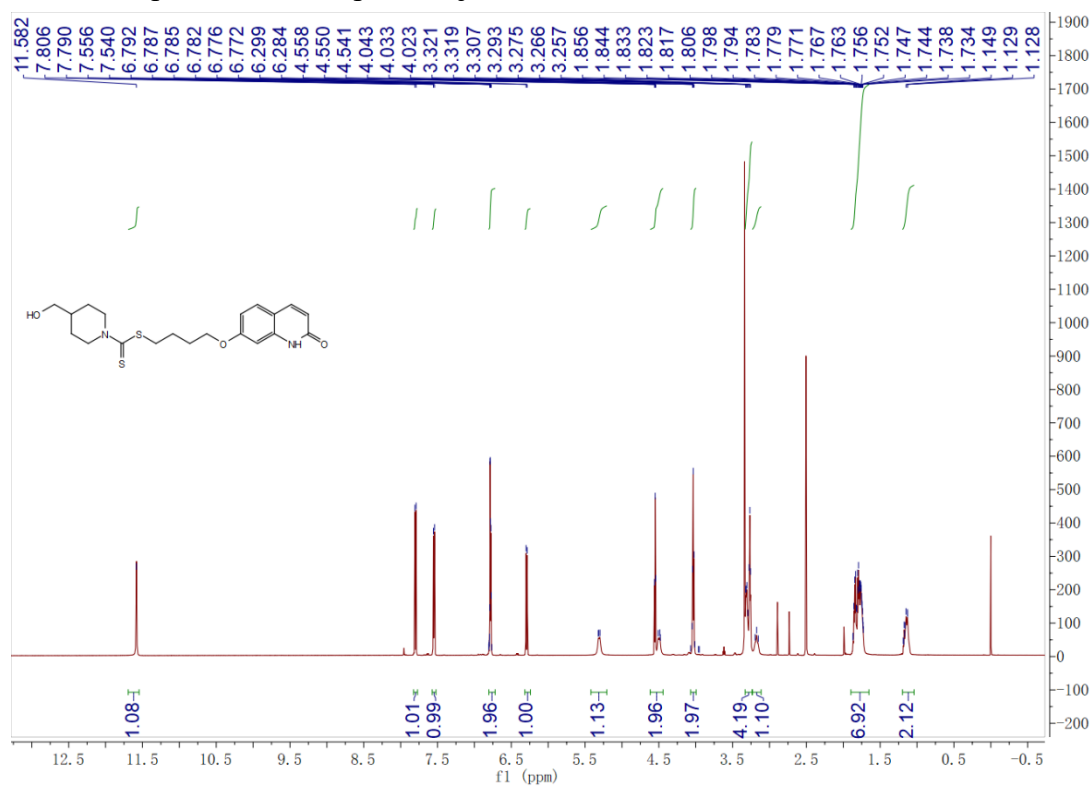

<sup>13</sup>C NMR spectrum of compound 4j

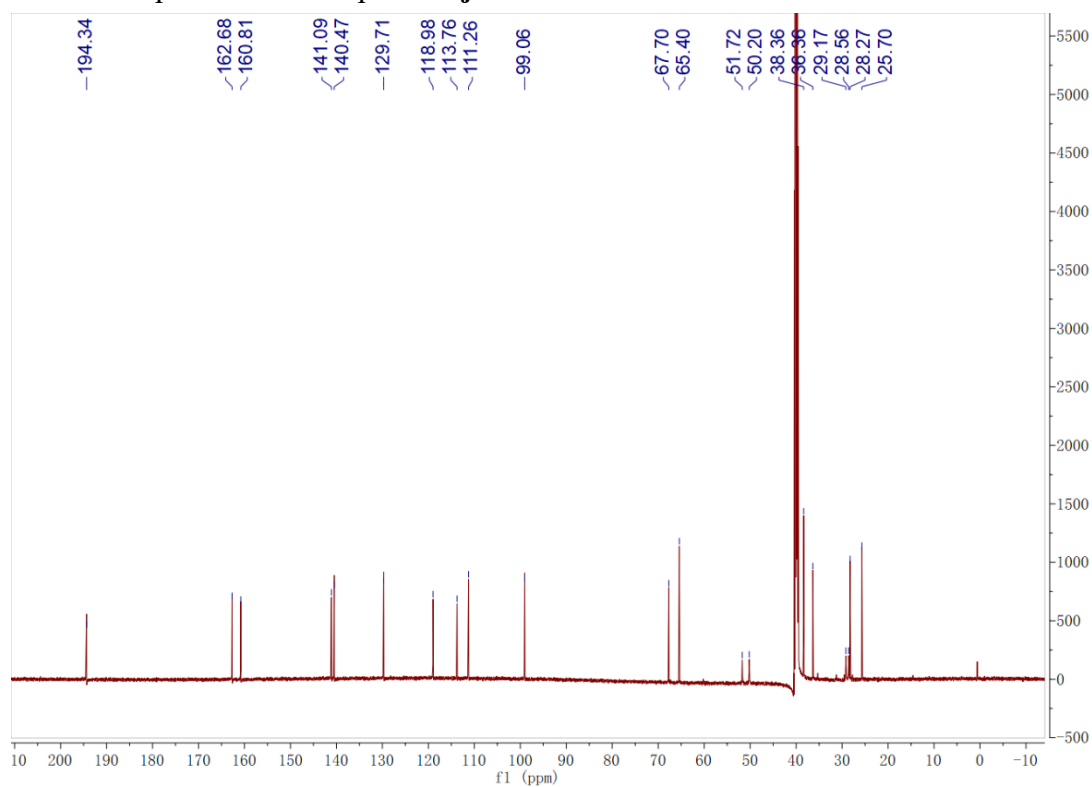

# HRMS (ESI) spectrum of compound **4j**.

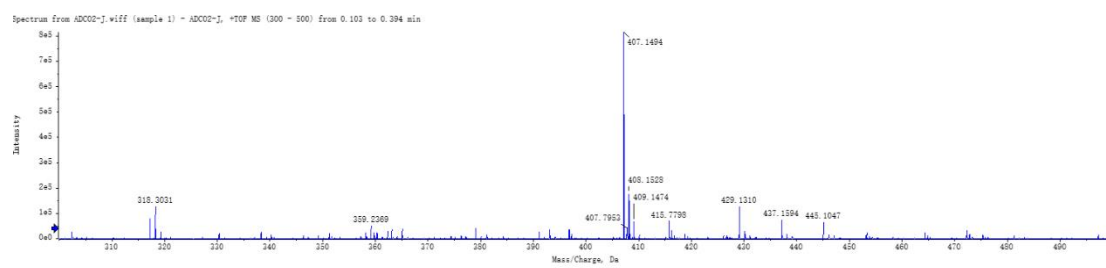

<sup>1</sup>H NMR spectrum of compound **4k**

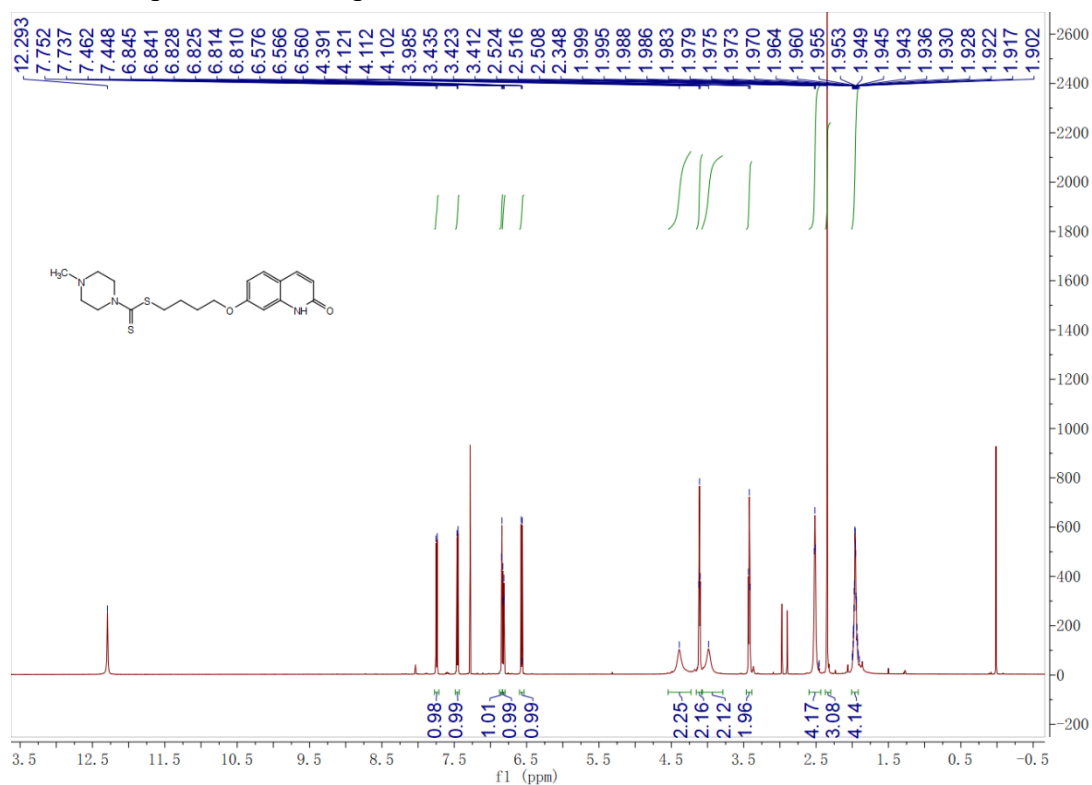

<sup>13</sup>C NMR spectrum of compound **4k**

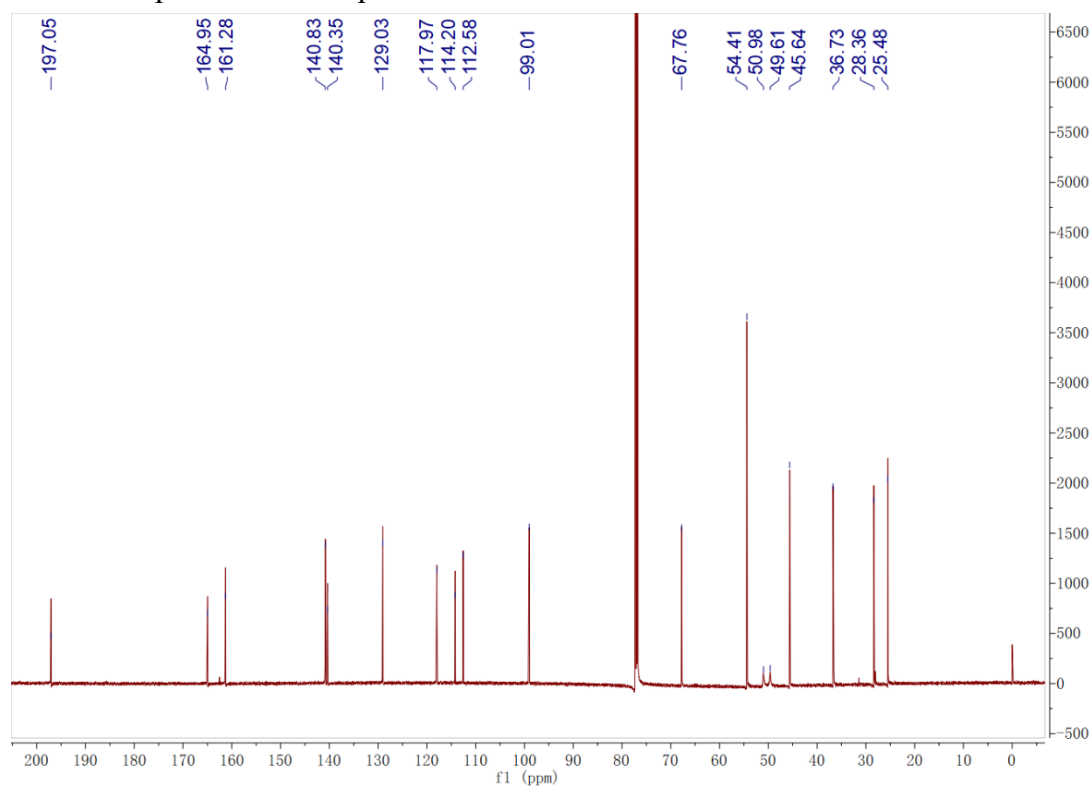

# HRMS (ESI) spectrum of compound **4k**.

Spectrum from ADC02-1.wiff (sample 1) - ADC02-1, \*TOP MS (300 - 500) from 0.086 to 0.377 min

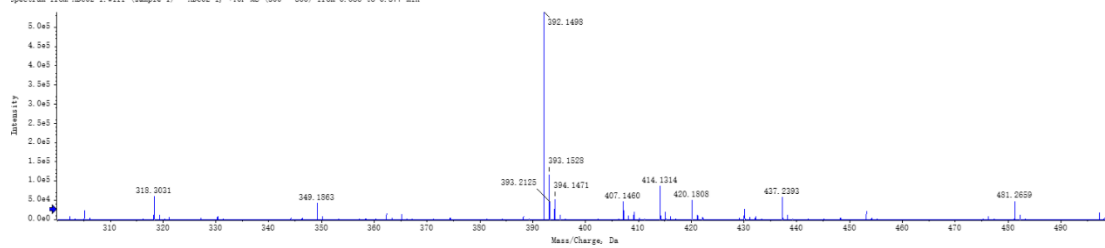

### <sup>1</sup>H NMR spectrum of compound 4I

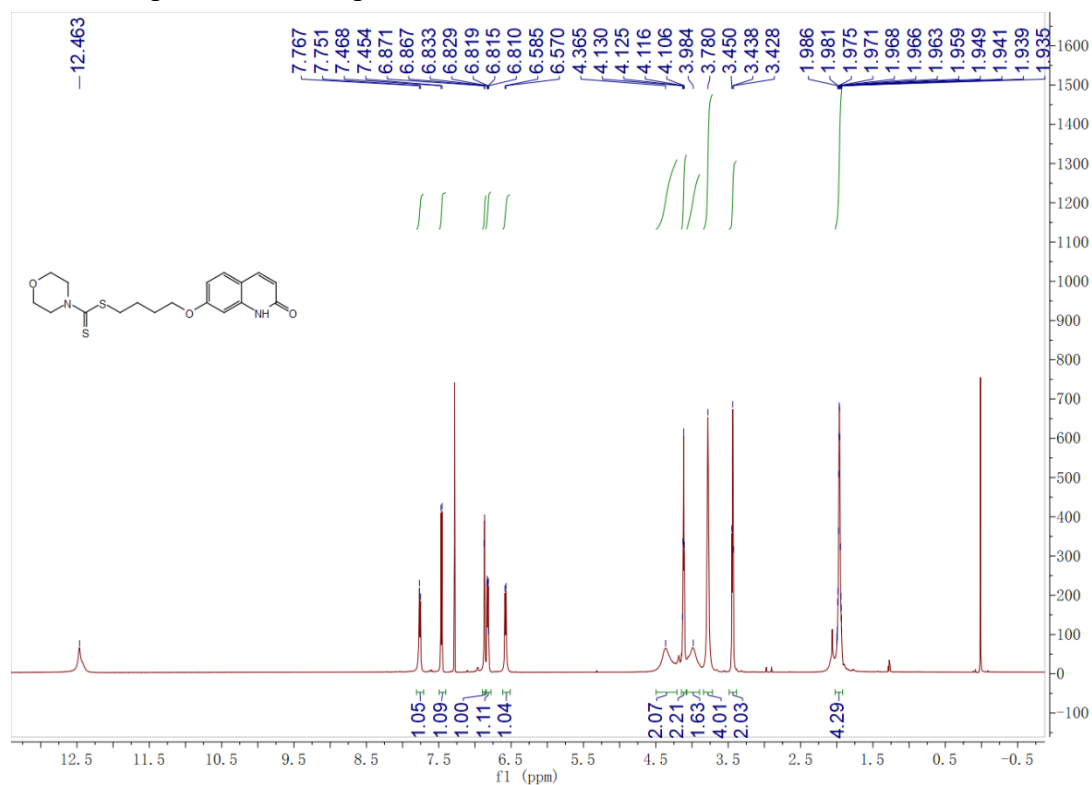

### <sup>13</sup>C NMR spectrum of compound 4I

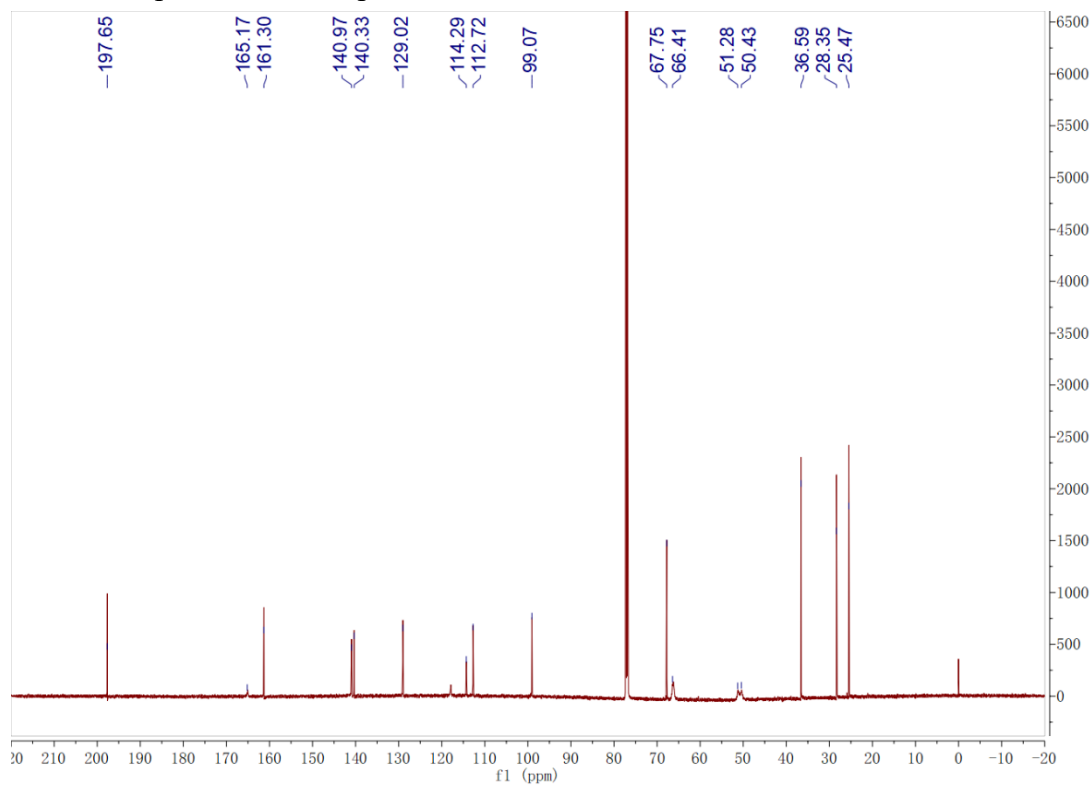



# HRMS (ESI) spectrum of compound **4l**.

Spectrum from ADC02-n.wiff (sample 1) - ADC02-n. +TOP MS (320 - 450) from 0.137 to 0.377 min

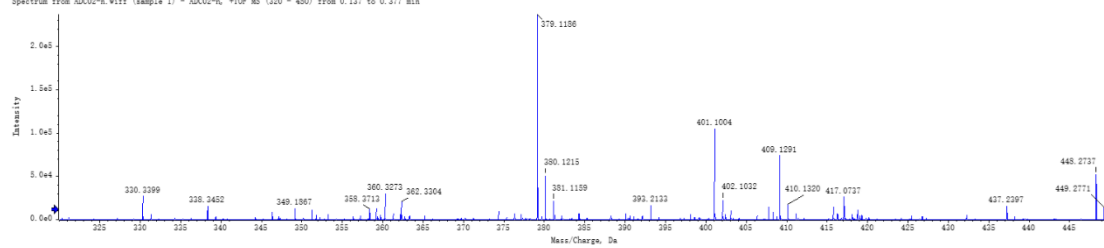

<sup>1</sup>H NMR spectrum of compound **4m**

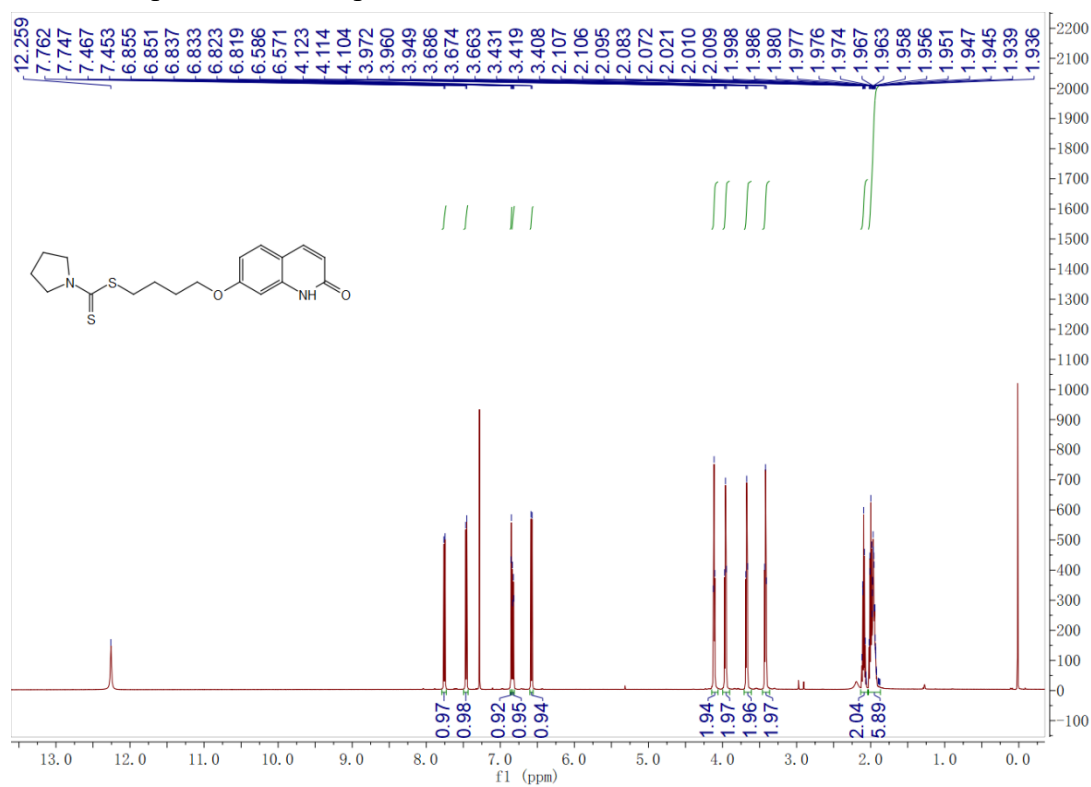

<sup>13</sup>C NMR spectrum of compound **4m**

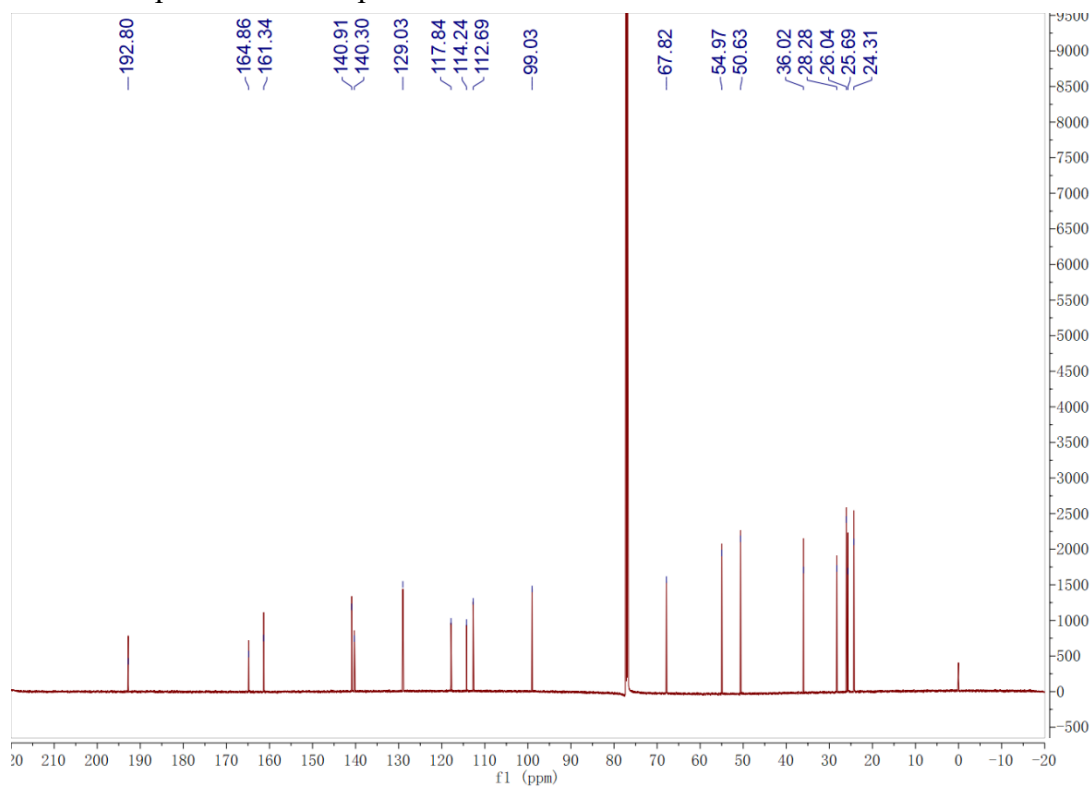

# HRMS (ESI) spectrum of compound **4m**

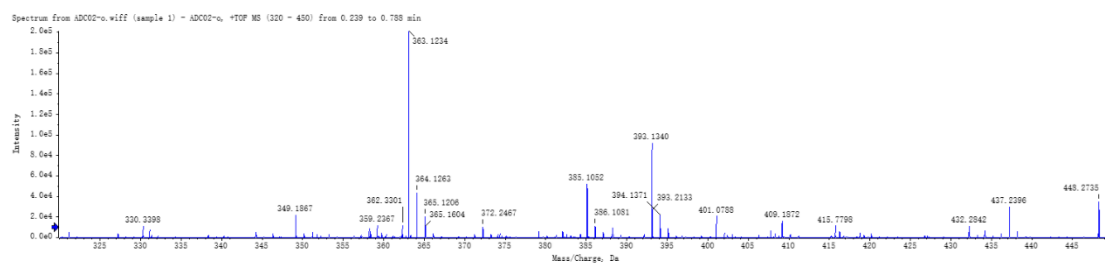

$^1\text{H}$  NMR spectrum of compound **9a**

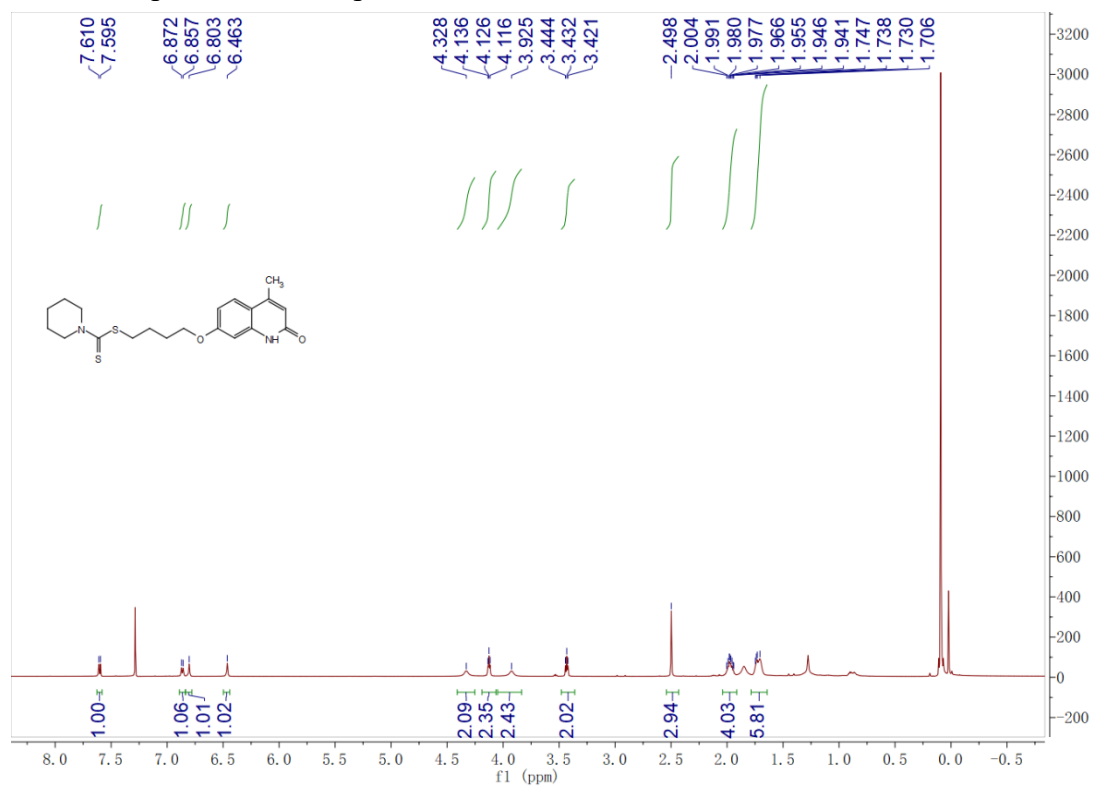

$^{13}\text{C}$  NMR spectrum of compound **9a**

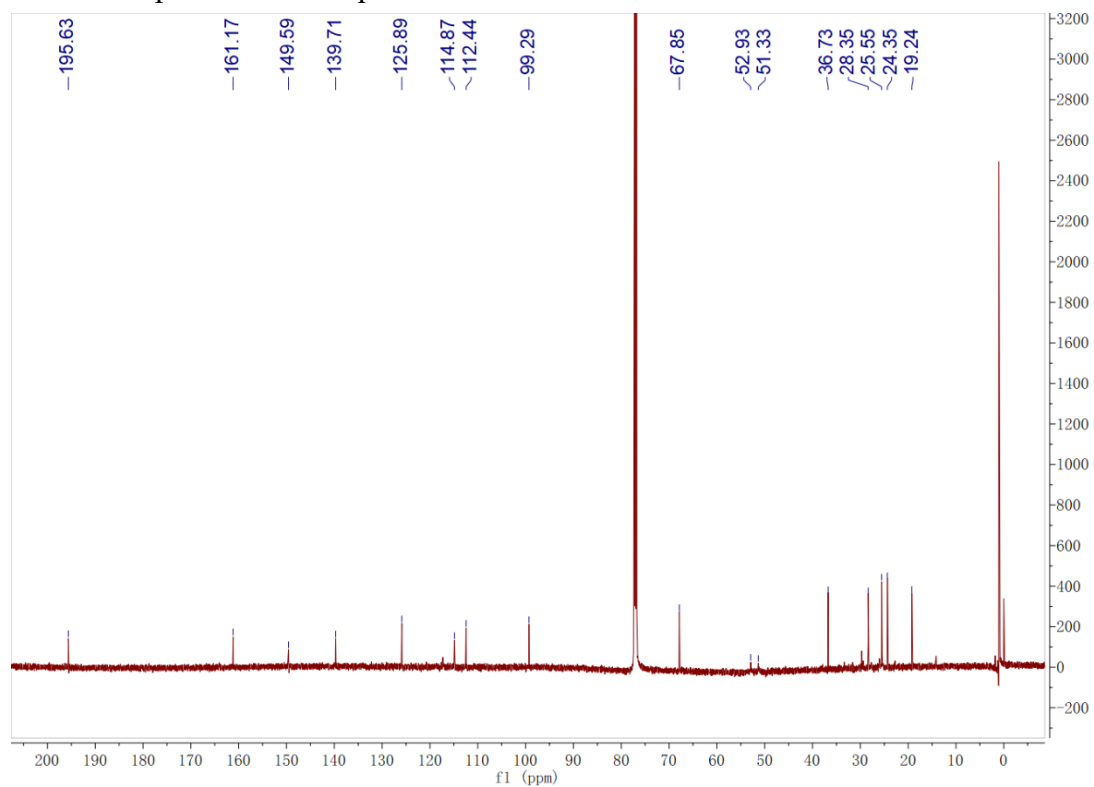

# HRMS (ESI) spectrum of compound **9a**

Spectrum from ADC02-g.wiff (sample 1) - ADC02-g. \*TOP MS (300 - 500) from 0.171 to 0.462 min

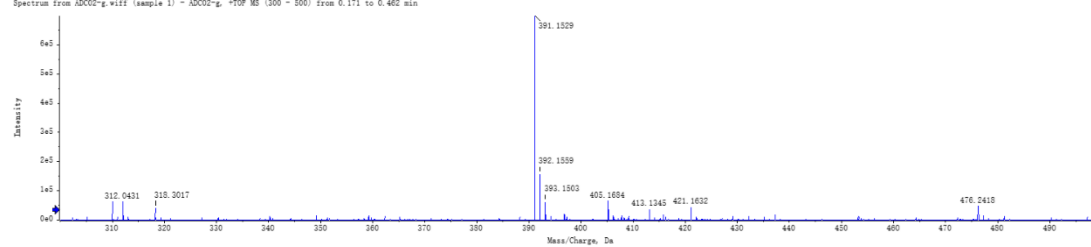

### <sup>1</sup>H NMR spectrum of compound **9b**

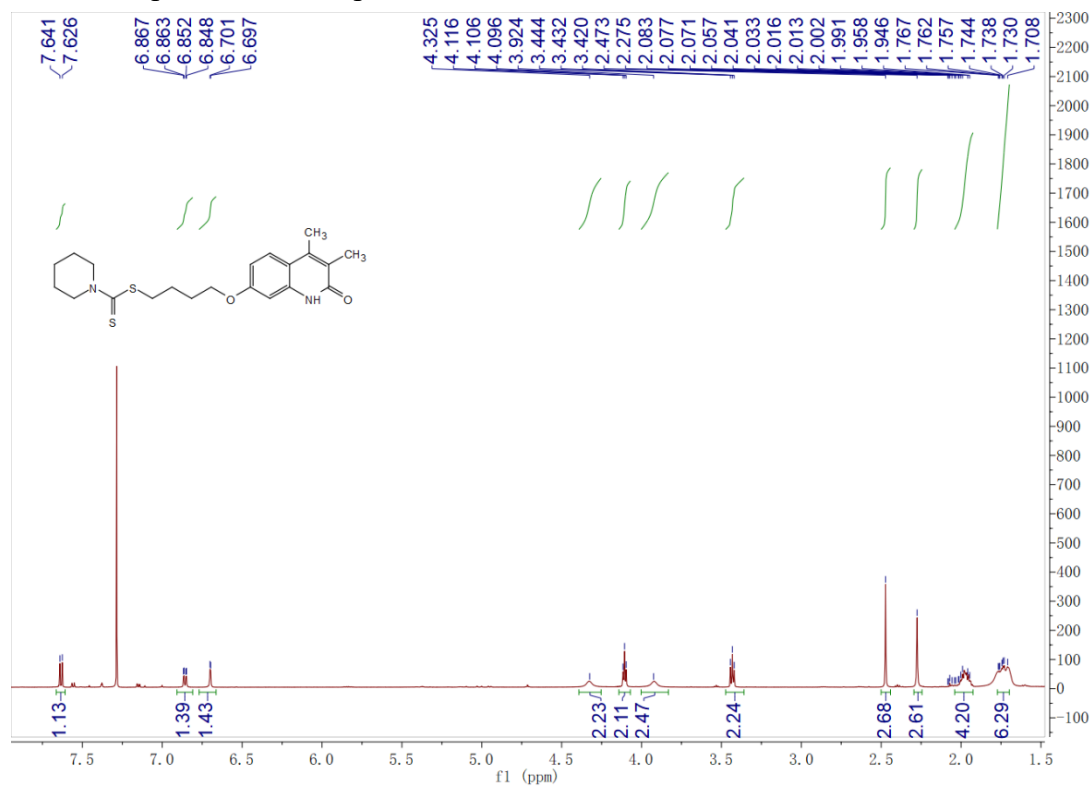

### <sup>13</sup>C NMR spectrum of compound **9b**

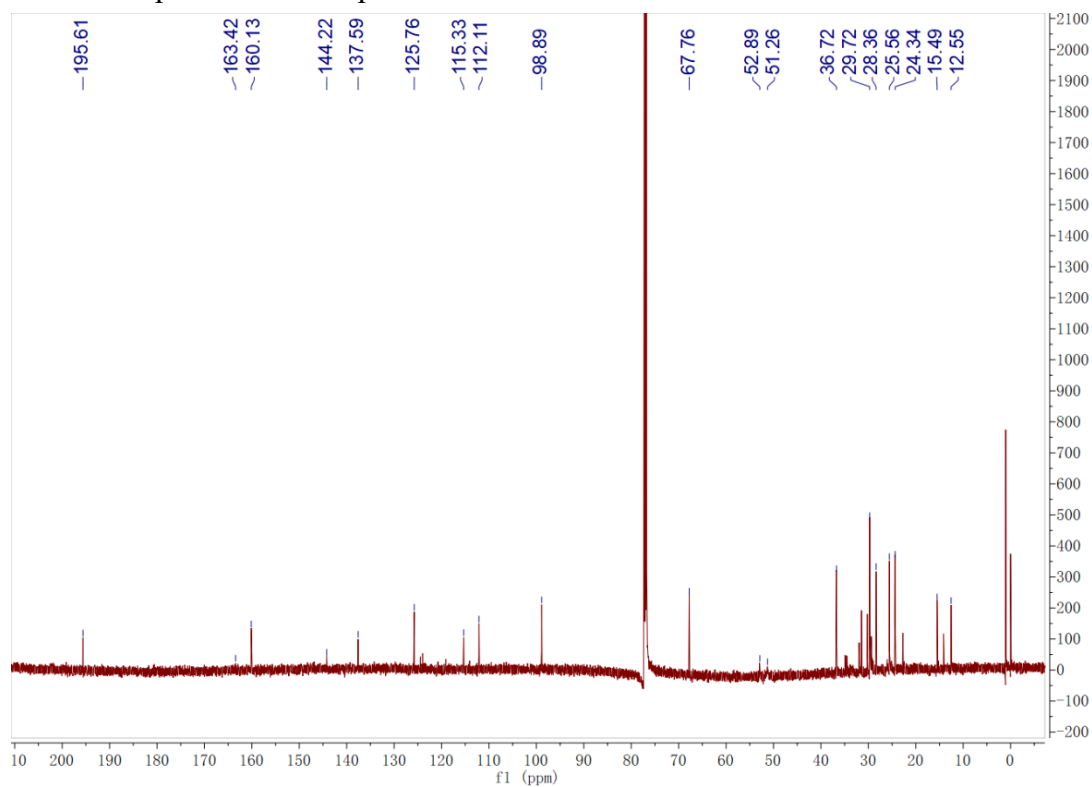

## HRMS (ESI) spectrum of compound **9b**

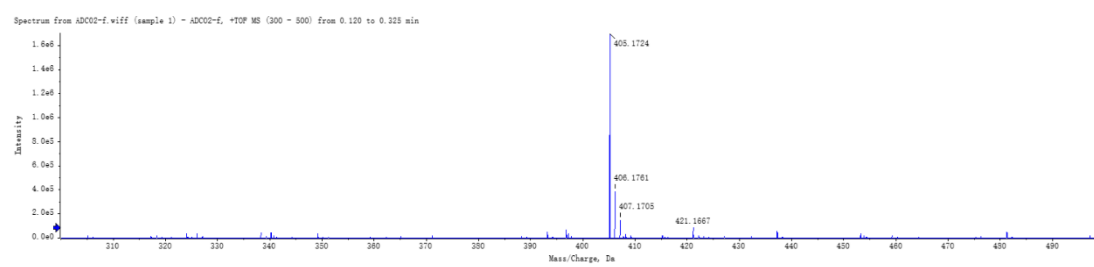

**Table S1** S value of the compounds **4a-m** and **9a-b** in active site of AChE.

| Compound         | S value             |                      |
|------------------|---------------------|----------------------|
|                  | <i>h</i> AChE(4EY7) | <i>Tc</i> AChE(2CKM) |
| <b>4a</b>        | -6.237              | -6.940               |
| <b>4b</b>        | -7.025              | -7.061               |
| <b>4c</b>        | <b>-7.863</b>       | <b>-7.540</b>        |
| <b>4d</b>        | -7.739              | -7.154               |
| <b>4e</b>        | -7.384              | -7.238               |
| <b>4f</b>        | -7.350              | -7.119               |
| <b>4g</b>        | -7.027              | -7.002               |
| <b>4h</b>        | -7.000              | -7.039               |
| <b>4i</b>        | -6.105              | -5.580               |
| <b>4j</b>        | -6.557              | -5.719               |
| <b>4k</b>        | -6.399              | -4.353               |
| <b>4l</b>        | -6.054              | -6.091               |
| <b>4m</b>        | -6.605              | -5.750               |
| <b>9a</b>        | -7.631              | -7.155               |
| <b>9b</b>        | -7.851              | -7.468               |
| <b>donepezil</b> | -8.300              | -7.472               |



**Table S2** Docking orientations of compounds **4a-m** and **9a-b** with *hAChE* and *TcAChE*.

| Compd. | <i>hAChE</i> (4EY7) | <i>TcAChE</i> (2CKM) |
|--------|---------------------|----------------------|
| 4a     |                     |                      |
| 4b     |                     |                      |
| 4c     |                     |                      |
| 4d     |                     |                      |
| 4e     |                     |                      |
